# Supplementary material for: Passive eDNA collection enhances aquatic biodiversity analysis
Source: PubMed Central journal article supplement (PMC7900116; doi:10.1038/s42003-021-01760-8), 2021-02-22
Supplement: 42003_2021_1760_MOESM2_ESM.pdf [file 42003_2021_1760_MOESM2_ESM.pdf]

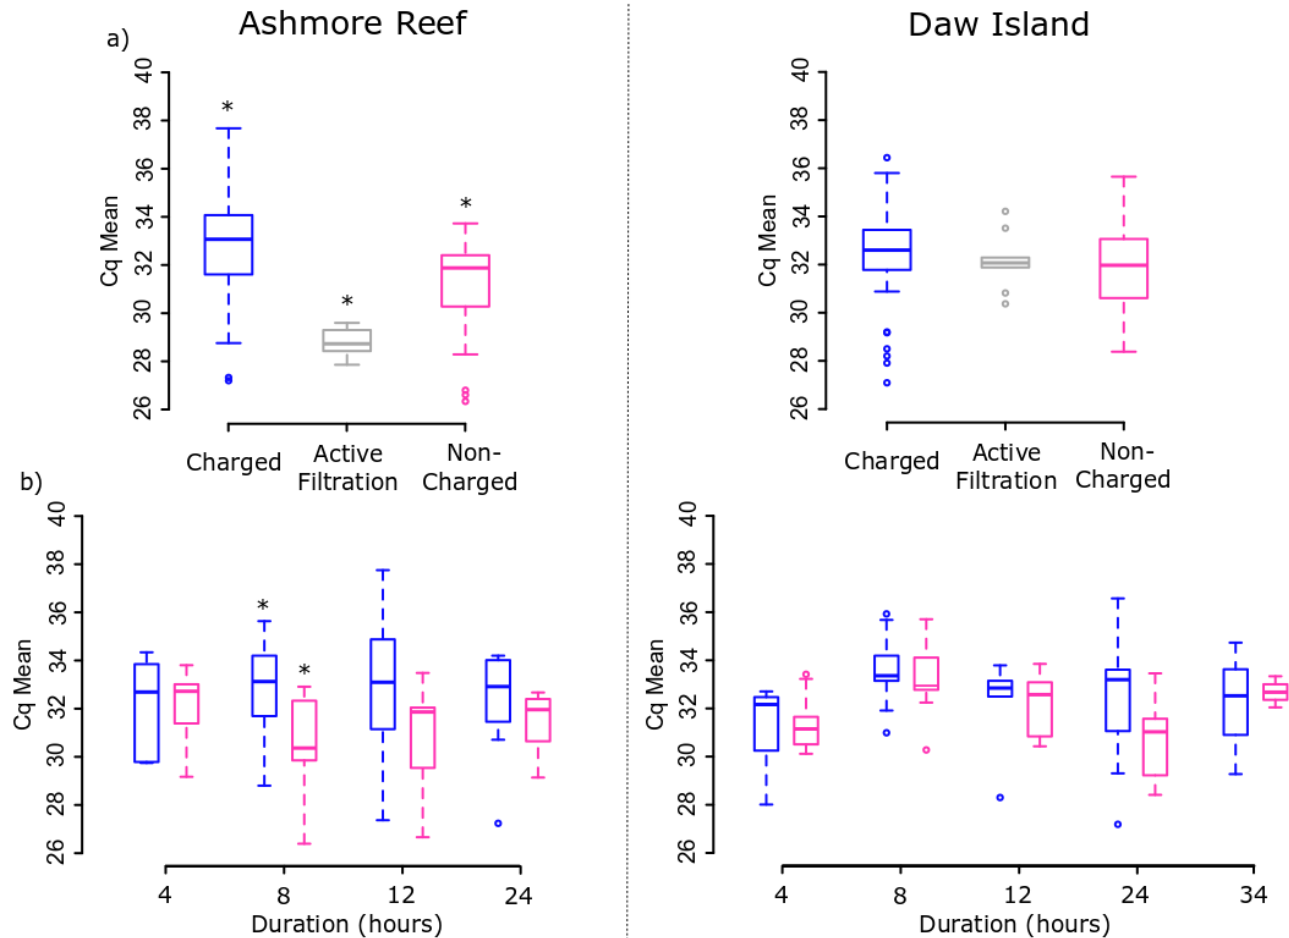

1

2 Figure S1. Boxplots of Cq mean values used as indication of initial DNA copy number at Ashmore Reef (charged n=33, active  
 3 filtration n=9, and non-charged n=39), and , and Daw Island (charged n=38, active filtration n=9, and non-charged n=31),  
 4 respectively, by treatment and b) by submersion duration and treatment (Ashmore Reef, charged: 4 hours n=6, 8 hours n=9, 12 hours  
 5 n=8, 24 hours n=8, noncharged: 4 hours n=9, 8 hours n=9, 12 hours n=8, 24 hours n=7; Daw Island, charged: 4 hours n=8, 8 hours  
 6 n=9, 12 hours n=9, 24 hours n=9, 34 hours=3, noncharged: 4 hours n=9, 8 hours n=9, 12 hours n=9, 24 hours n=9, 34 hours=3). An \*  
 7 indicates significance between treatments ( $\alpha=0.05$ ) and for treatments at each time interval.

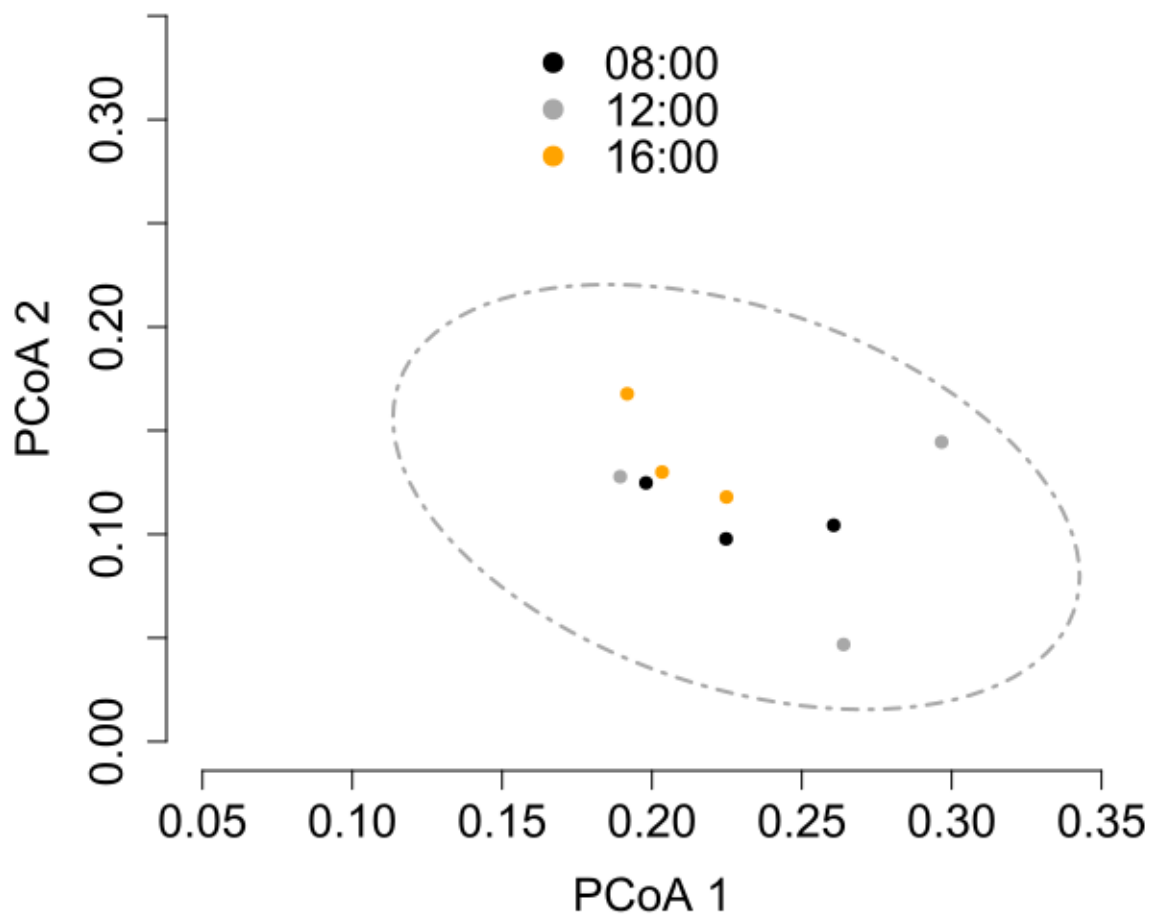

8

9 Figure S2. A detailed view of the Ashmore Reef principal coordinate analysis plot for active  
10 filtration by time of collection on the sample day.

11

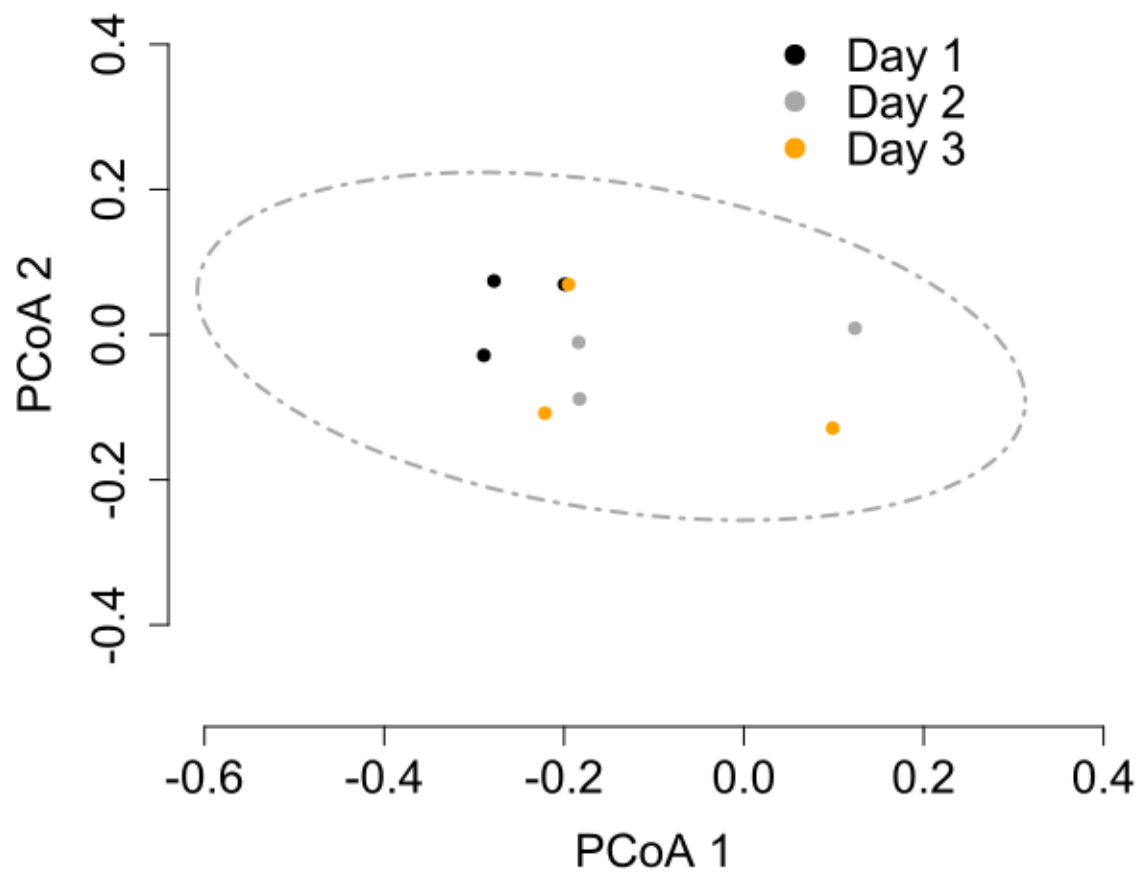

12

13 Figure S3. A detailed view of the Daw Island principal coordinate analysis plot for active  
14 filtration by day of sample collection.
